# Supplementary material
Source: Royal Society of Chemistry journal article supplement (doi:10.1039/d6nj00558f)
Supplement: d6nj00558f1.pdf [file d6nj00558f1.pdf]

**Structural and theoretical evidence of rare synergic N(amide)H...Au(I)  
and N(amidate)...Au(I) secondary bonding interactions**

Laura Coconubo-Guio, Sonia Moreno, Giacomo Picci, Miguel Monge, José M. López-de-Luzuriaga, M. Elena Olmos, Claudia Caltagirone, Vito Lippolis

**Electronic Supplementary Information**

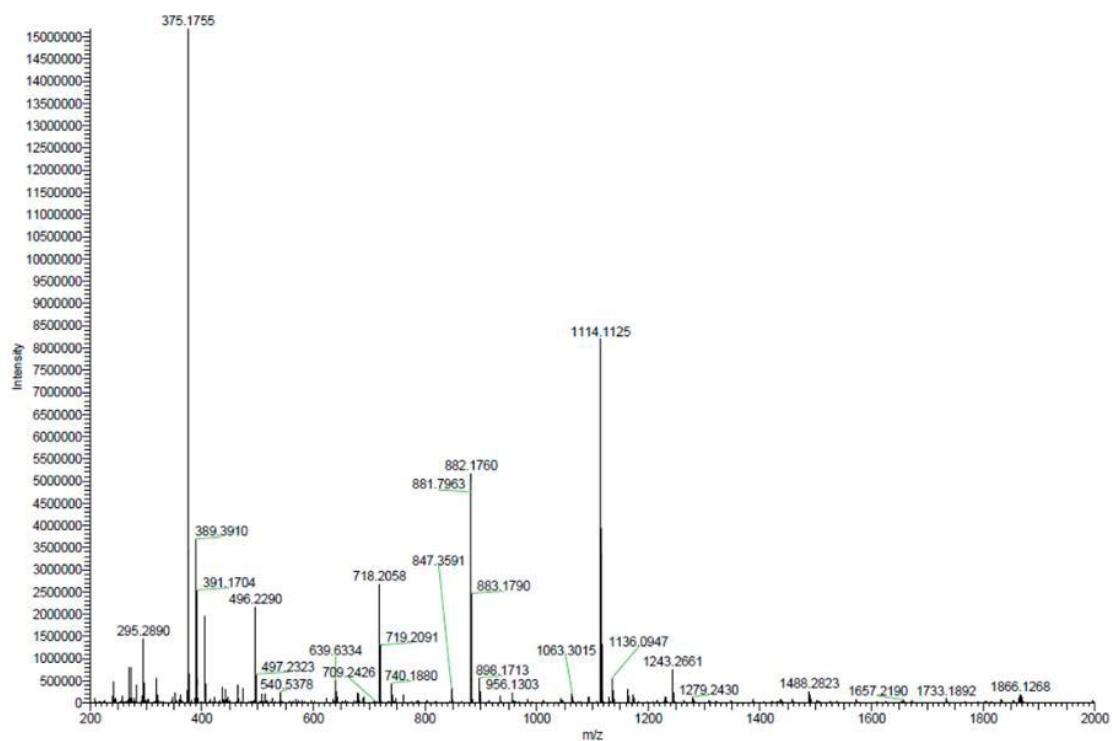

**Figure S1.** ESI positive mass spectrum of  $[(\text{AuCl})_2(\text{L})]$  (**1**):  $m/z = 375.17$   $[\text{C}_{19}\text{H}_{11}\text{N}_3\text{O}_2\text{P}_2]^+$   $[\text{L}-4\text{Ph}_2-2\text{H}]^+$ ,  $1114.1125$   $[\text{C}_{43}\text{H}_{33}\text{Au}_2\text{ClN}_3\text{O}_2\text{P}_2]$   $[\text{M}-\text{Cl}]^+$ ,  $882.1760$   $[\text{C}_{43}\text{H}_{33}\text{AuN}_3\text{O}_2\text{P}_2]$   $[\text{M}-\text{Au}-2\text{Cl}]^+$ .

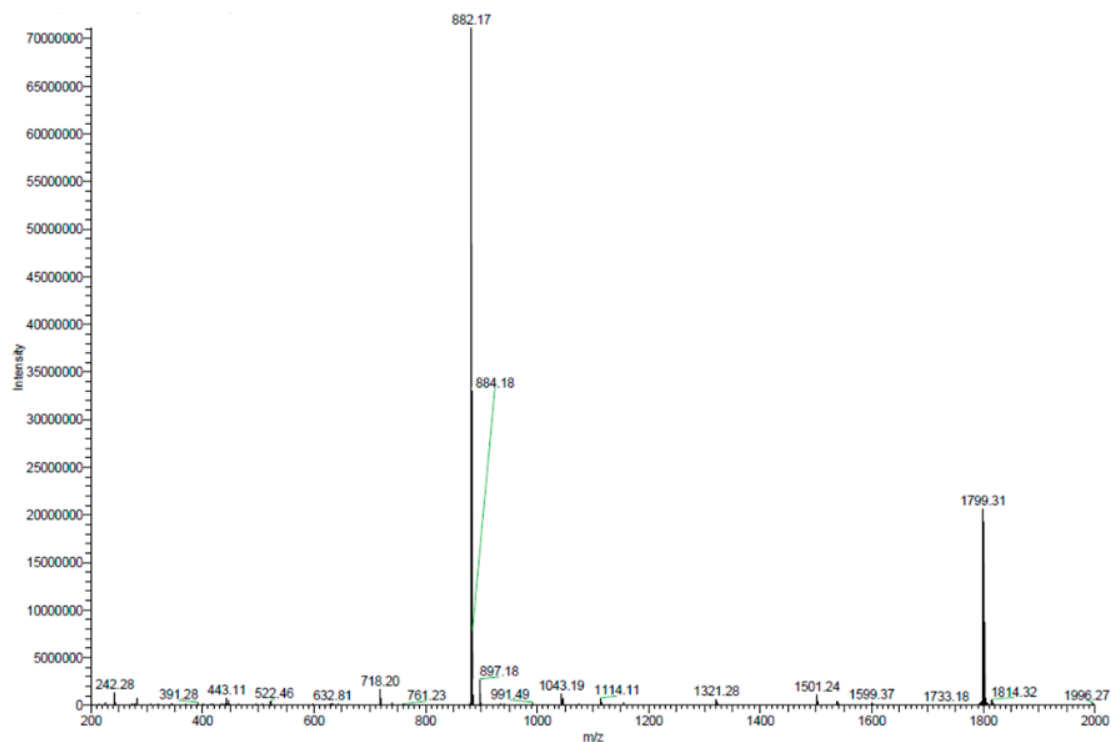

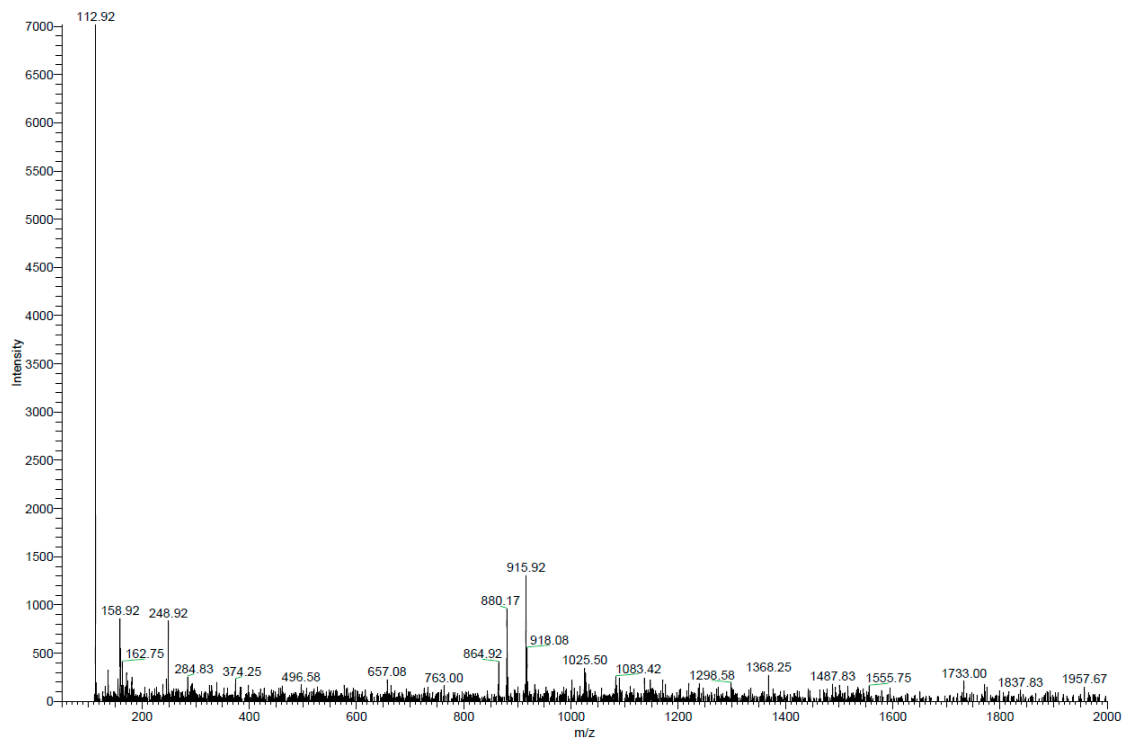

**Figure S2.** ESI mass spectra of  $[\text{AuCl}(\text{L})]$  (**2**): positive mode (top):  $m/z = 882.17$   $[\text{C}_{43}\text{H}_{33}\text{AuN}_3\text{O}_2\text{P}_2]^+ [\text{M}-\text{Cl}]^+$ ; negative mode (bottom):  $m/z = 915.92$   $[\text{C}_{43}\text{H}_{31}\text{AuClN}_3\text{O}_2\text{P}_2]^{2-} [\text{M}-2\text{H}]^{2-}$ .

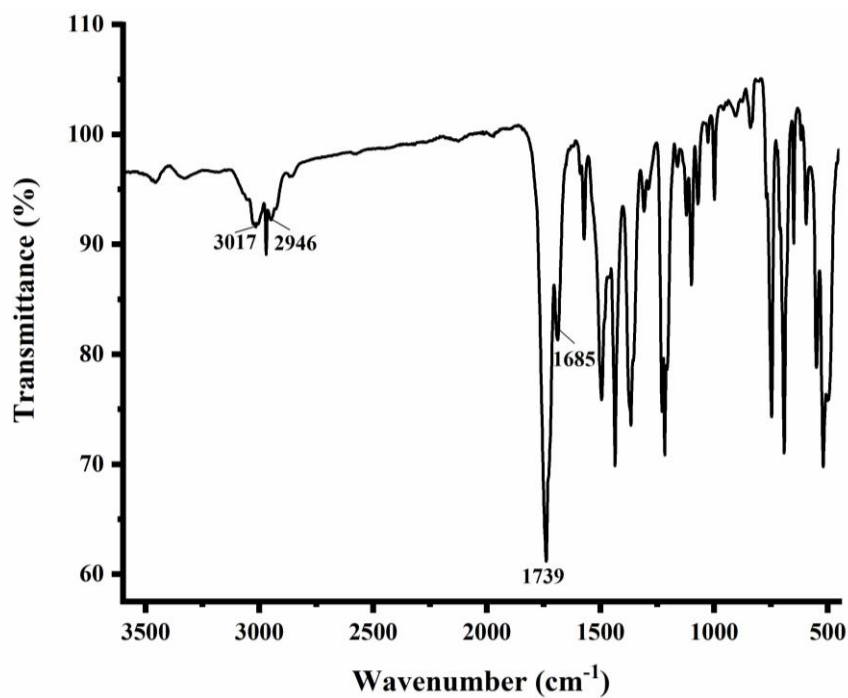

**Figure S3.** UATR-IR spectrum of  $[(\text{AuCl})_2(\text{L})]$  (**1**):  $\nu$  (N-H) = 3017-2946 (m)  $\text{cm}^{-1}$ ,  $\nu$  (C=O) = 1739 (vs, br)  $\text{cm}^{-1}$ , (C-H<sub>py</sub>) = 1685 (vs, br)  $\text{cm}^{-1}$ .

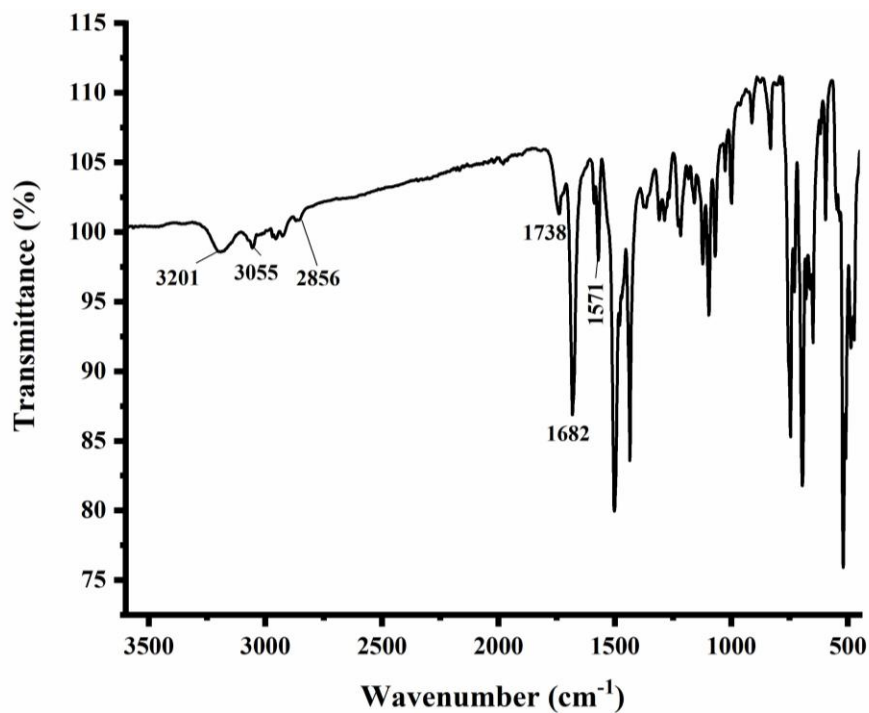

**Figure S4.** UATR-IR spectrum of [(AuCl)(L)] (**2**):  $\nu$  (N-H) = 3201-286.5 (m) cm<sup>-1</sup>,  $\nu$  (C=O) = 1738 (vs, br) cm<sup>-1</sup>, (C-H<sub>py</sub>) = 1682 (vs, br) cm<sup>-1</sup>.

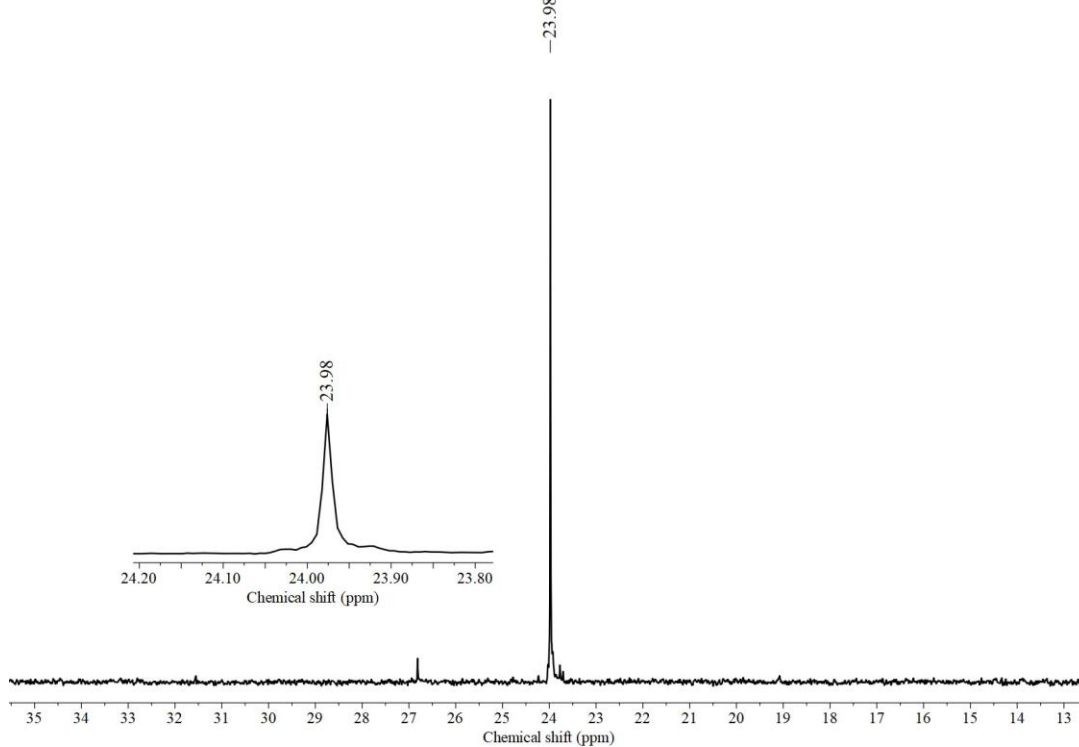

**Figure S5.** <sup>31</sup>P{<sup>1</sup>H} NMR spectrum of [(AuCl)<sub>2</sub>(L)] (**1**).

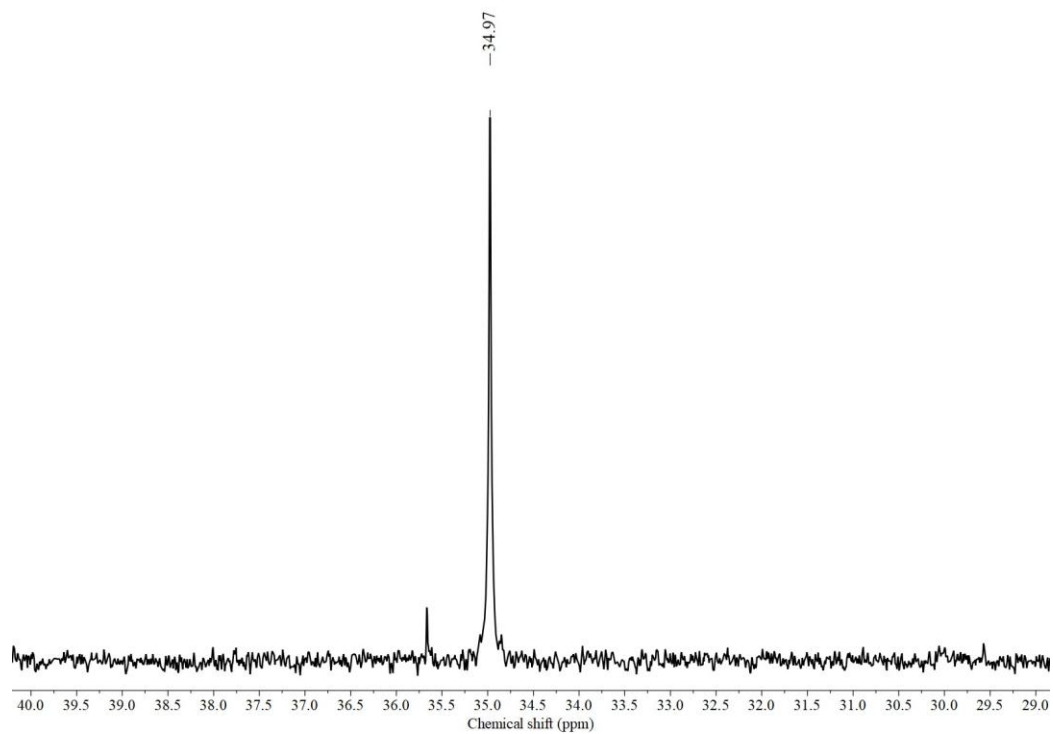

Figure S6.  $^{31}\text{P}\{^1\text{H}\}$  NMR spectrum of  $[(\text{AuCl})(\text{L})]$  (2).

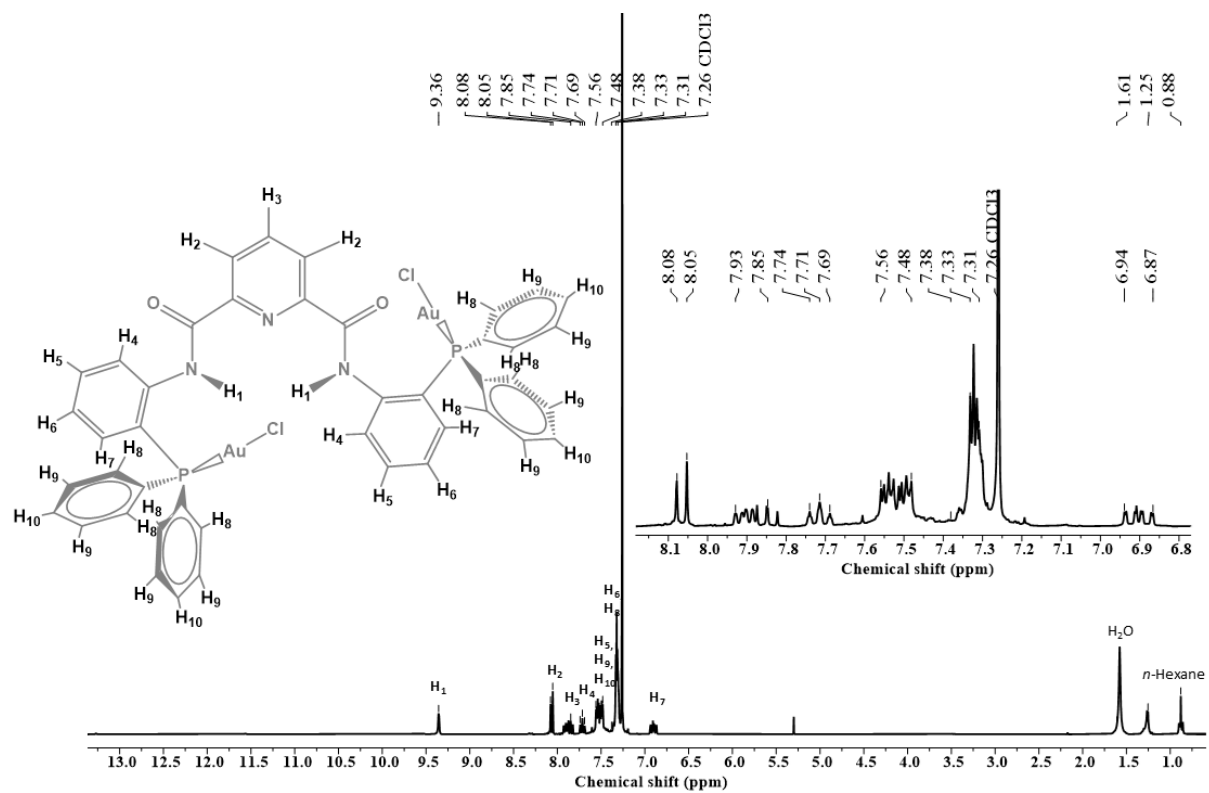

Figure S7.  $^1\text{H}$  NMR spectrum of  $[(\text{AuCl})_2(\text{L})]$  (1).

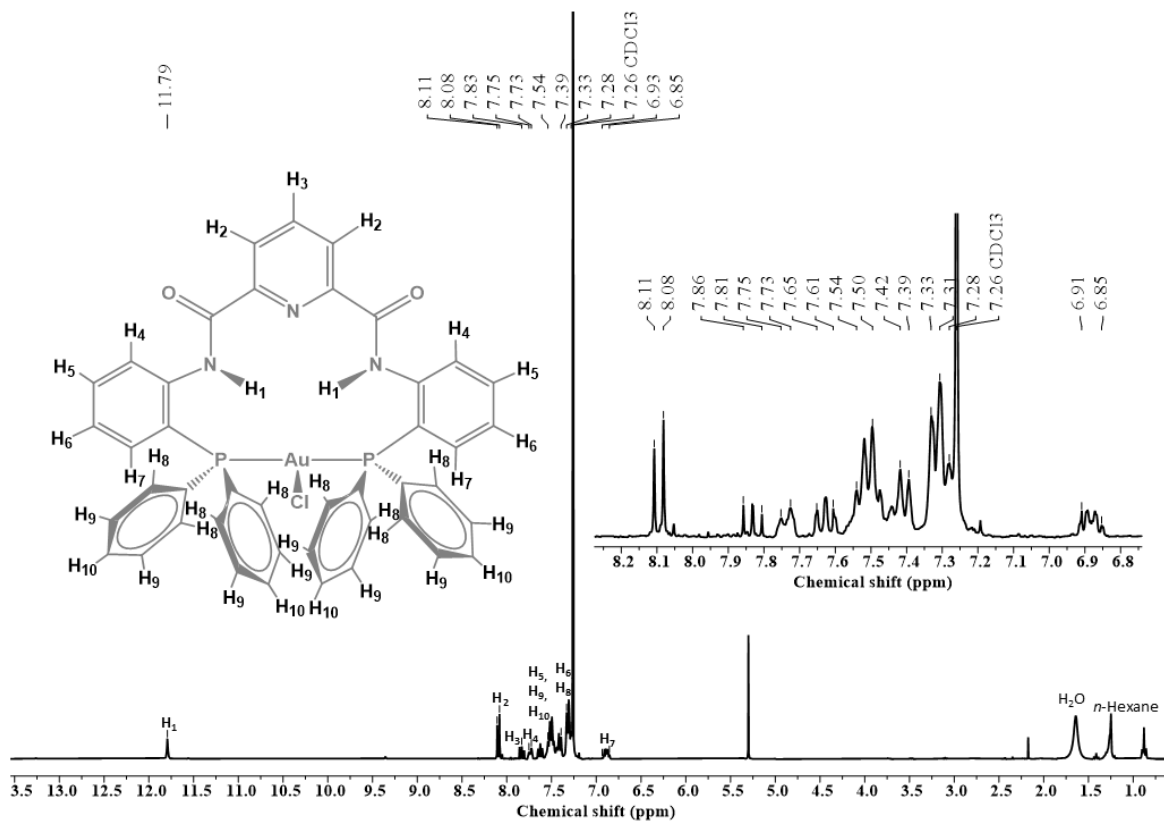

Figure S8.  $^1H$  NMR spectrum of  $[(AuCl)(L)]$  (2).

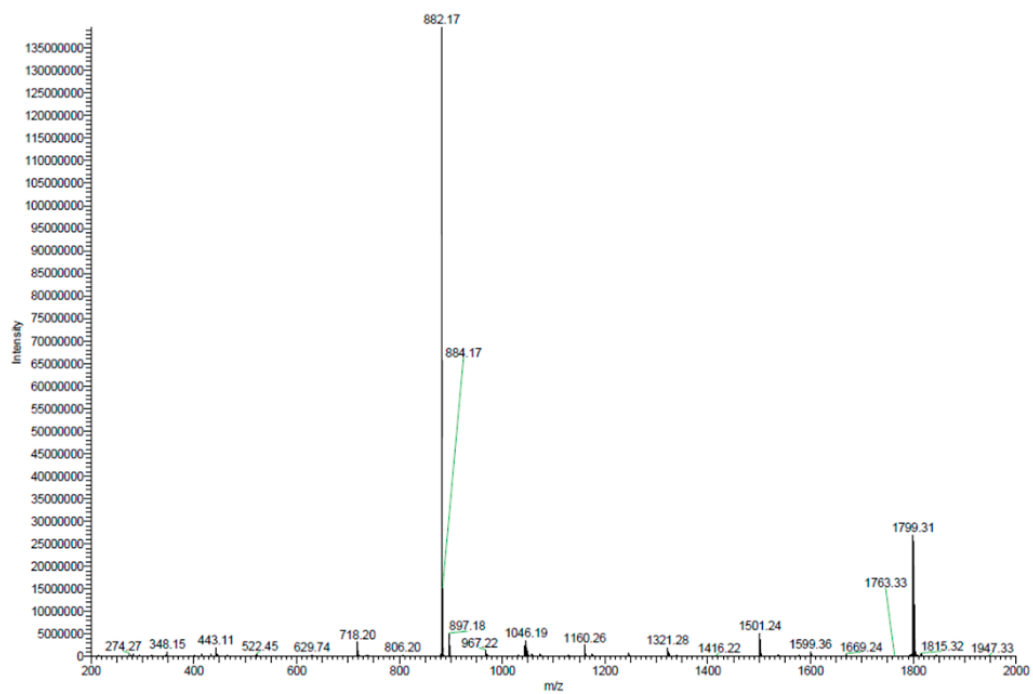

Figure S9. ESI mass spectra of  $[Au(L-H)]$  (3) in positive mode:  $m/z = 882.17$   $[C_{43}H_{33}AuN_3O_2P_2]^+$   $[M]^+$ .

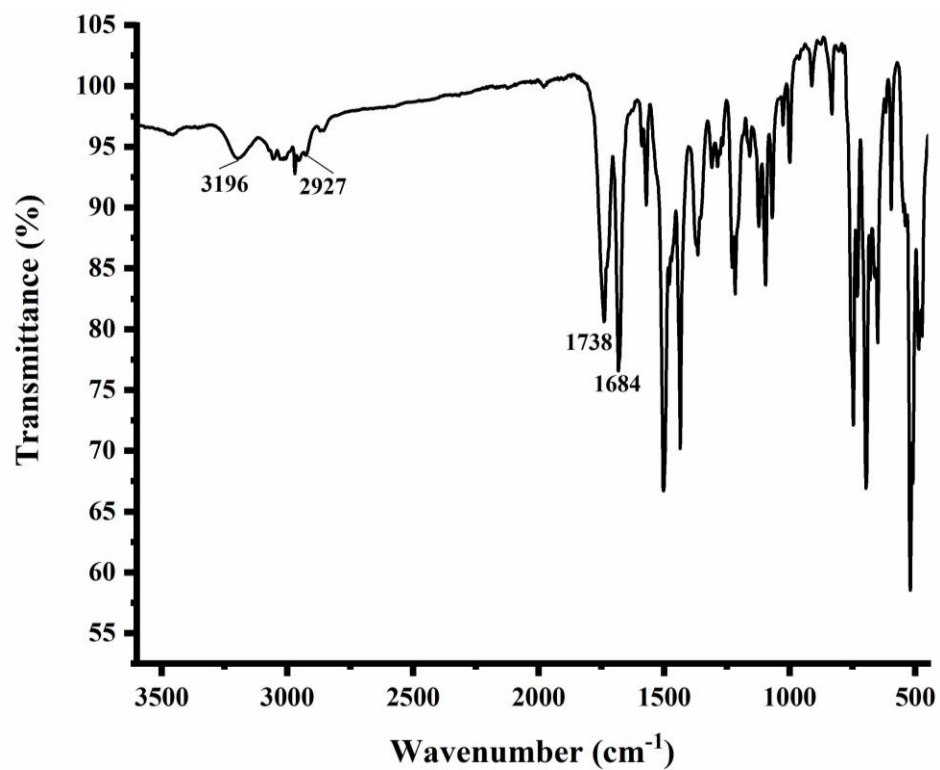

**Figure S10.** UATR-IR spectrum of  $[\text{Au}(\text{L-H})]$  (**3**):  $\nu$  (N-H) = 3196-2927 (m)  $\text{cm}^{-1}$ ,  $\nu$  (C=O) = 1738 (vs, br)  $\text{cm}^{-1}$ , (C-H<sub>py</sub>) = 1684 (vs, br)  $\text{cm}^{-1}$ .

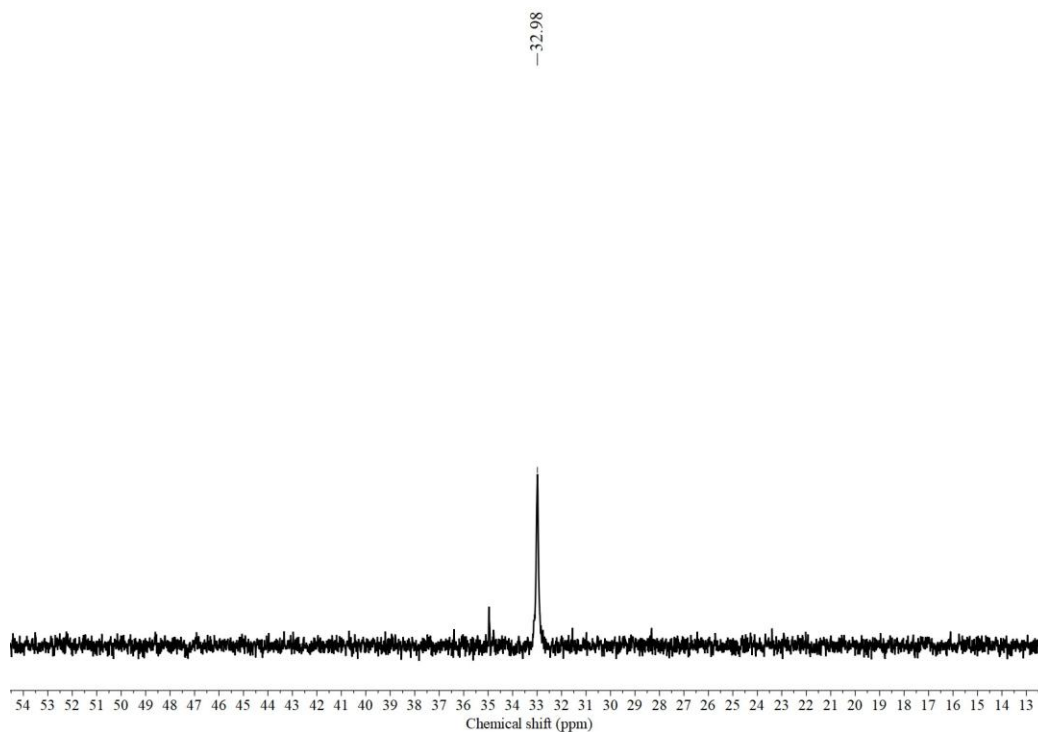

**Figure S11.**  $^{31}\text{P}\{^1\text{H}\}$  NMR spectrum of  $[\text{Au}(\text{L-H})]$  (**3**).

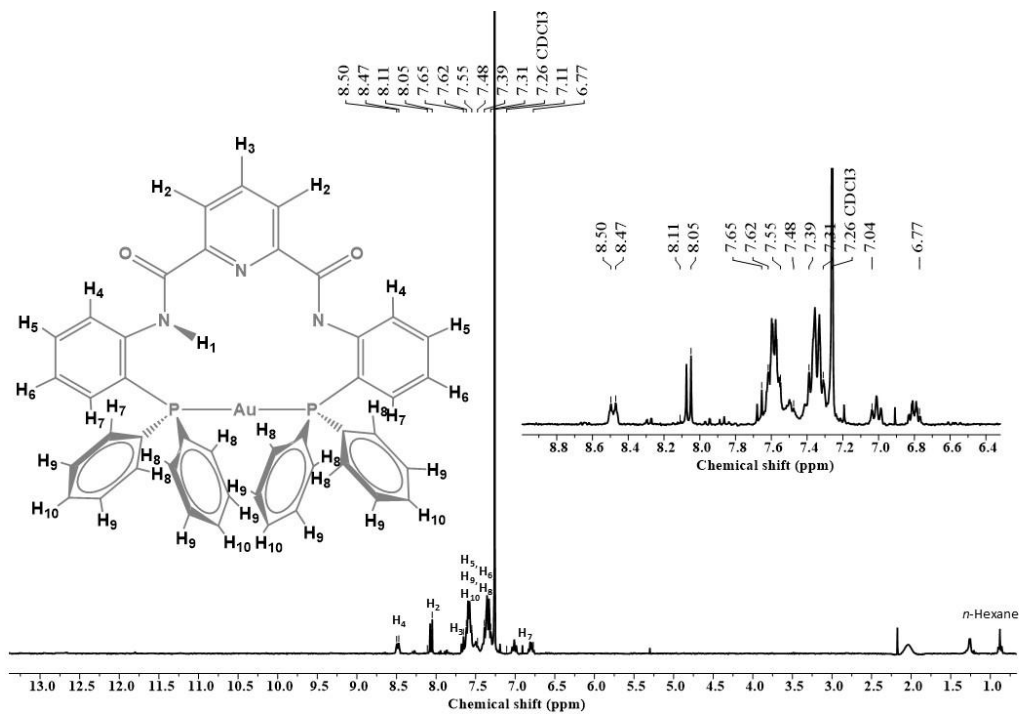

**Figure S12.**  $^1\text{H}$  NMR spectrum of  $[\text{Au}(\text{L-H})]$  (3).

**Table S1.** Hydrogen bonds for [(L)(AuCl)<sub>2</sub>] (**1**) [Å and °].

| D-H...A               | d(D-H)  | d(H...A)  | d(D...A) | <(DHA)   |
|-----------------------|---------|-----------|----------|----------|
| N(1)-H(1)...Au(1)     | 0.69(5) | 2.977(48) | 3.565(6) | 146      |
| C(36)-H(36)...O(1)#1  | 0.93    | 2.458(5)  | 3.388(9) | 179.1(5) |
| C(16)-H(16)...O(2)#2  | 0.93    | 2.409(5)  | 3.278(7) | 155.6(4) |
| C(33)-H(33)...Cl(1)#3 | 0.93    | 2.842(2)  | 3.524(7) | 131.1(4) |

Symmetry transformations used to generate equivalent atoms:

#1 -x+1,-y+1,-z #2 -x+1,-y,-z+1 #3 -x+1,-y+1,-z+1

**Table S2.** Hydrogen bonds for 2·1.5CH<sub>2</sub>Cl<sub>2</sub> [Å] and °.

| D-H...A               | d(D-H) | d(H...A)  | d(D...A)  | <(DHA)   |
|-----------------------|--------|-----------|-----------|----------|
| N(1)-H(1)...Au        | 0.86   | 2.8345(1) | 3.461(4)  | 132.1    |
| N(3)-H(3A)...Au       | 0.86   | 3.0316(1) | 3.620(3)  | 127.4    |
| N(1)-H(1)...Cl(1)     | 0.86   | 2.635(2)  | 3.359(4)  | 142.4(4) |
| N(3)-H(3A)...Cl(1)    | 0.86   | 2.586(2)  | 3.325(4)  | 144.8(4) |
| C(34)-H(34)...O(2)#1  | 0.93   | 2.699(6)  | 3.468(12) | 140.6(7) |
| C(5)-H(5)...O(2)#2    | 0.93   | 2.605(5)  | 3.524(6)  | 169.5(5) |
| C(23)-H(23)...O(1)#3  | 0.93   | 2.569(7)  | 3.429(14) | 154.0(7) |
| C(18)-H(18)...Cl(1)#4 | 0.93   | 2.973(2)  | 3.646(5)  | 130.6(5) |

Symmetry transformations used to generate equivalent atoms:

#1 -x+1,-y,-z+1 #2 -x+1,-y+1,-z+1 #3 -x,-y+1,-z+1 #4 -x+1,y-1/2,-z+1/2

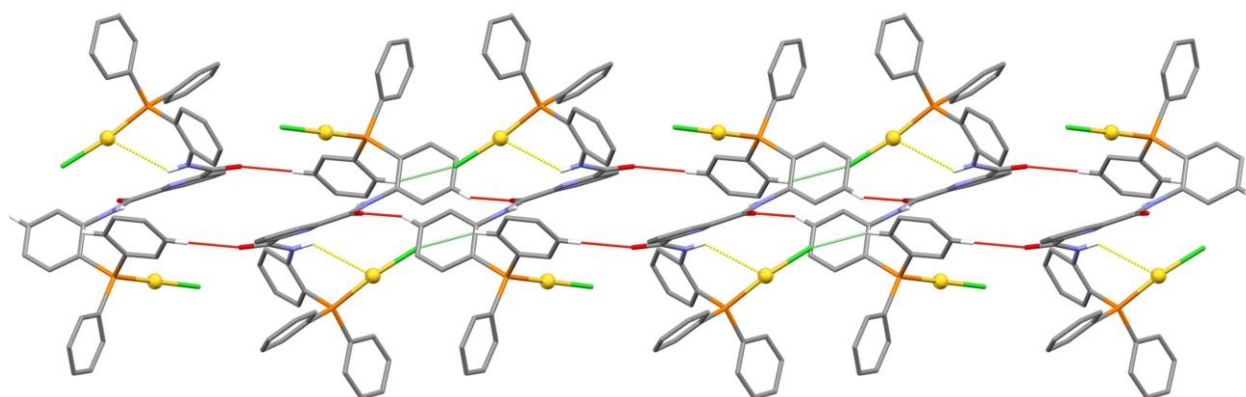

(A)

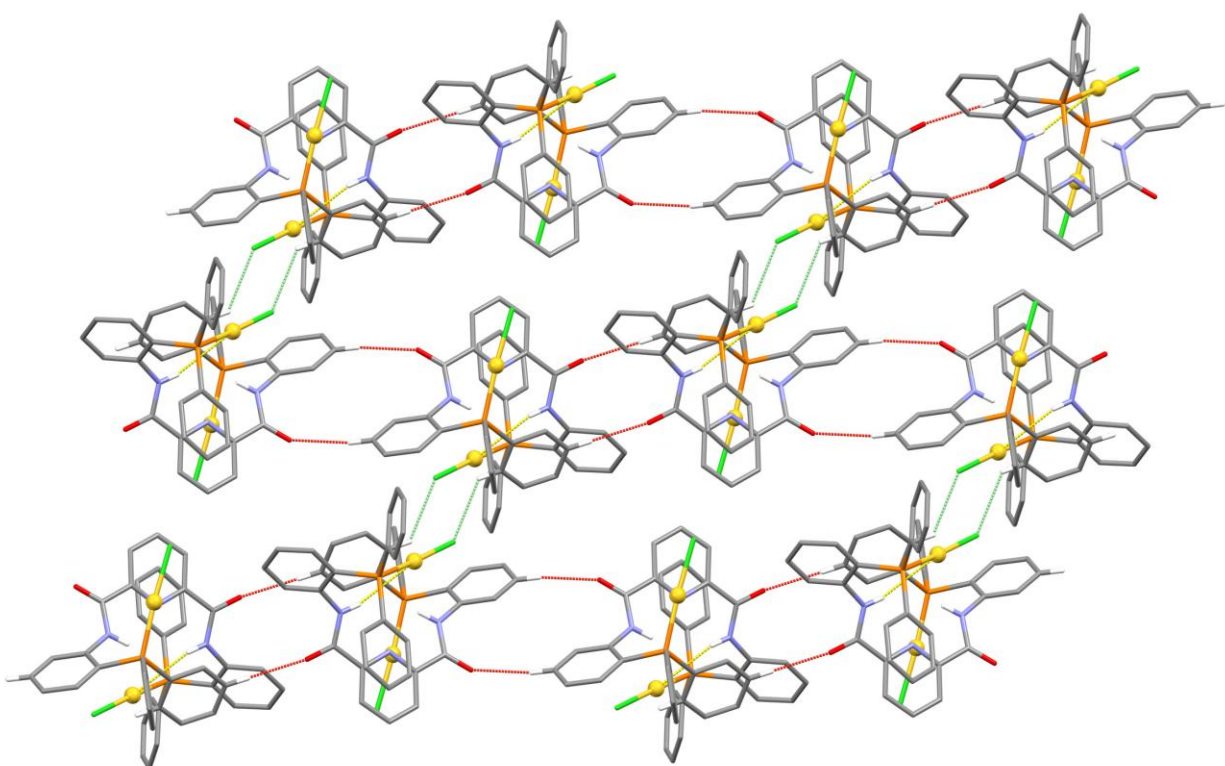

(B)

**Figure S13.** Part of the supramolecular structure of **1**: 1D network formed by C-H $\cdots$ O hydrogen bonds viewed from the crystallographic  $y$  axis (A), 2D network formed by C-H $\cdots$ O and C-H $\cdots$ Cl hydrogen bonds viewed from the crystallographic  $x$  axis (B). Hydrogen atoms, except those involved in hydrogen bonds, have been omitted for clarity. Color code: gold (yellow), phosphorus (orange), chlorine (green), nitrogen (purple), oxygen (red), carbon (gray), hydrogen (white), N-H $\cdots$ Au (dashed yellow), C-H $\cdots$ O (dashed red), and C-H $\cdots$ Cl (dashed green) hydrogen bonds.

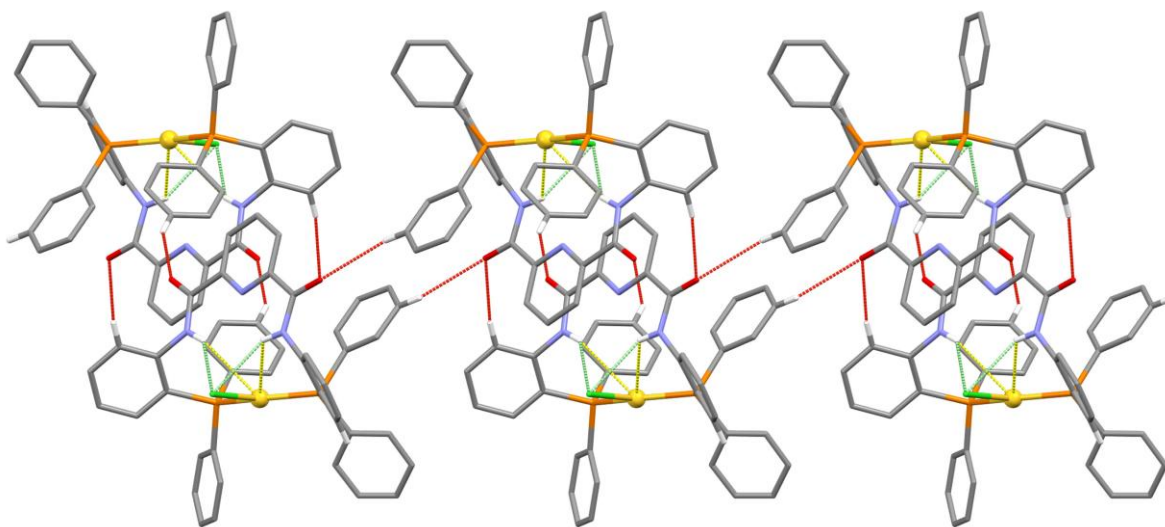

(A)

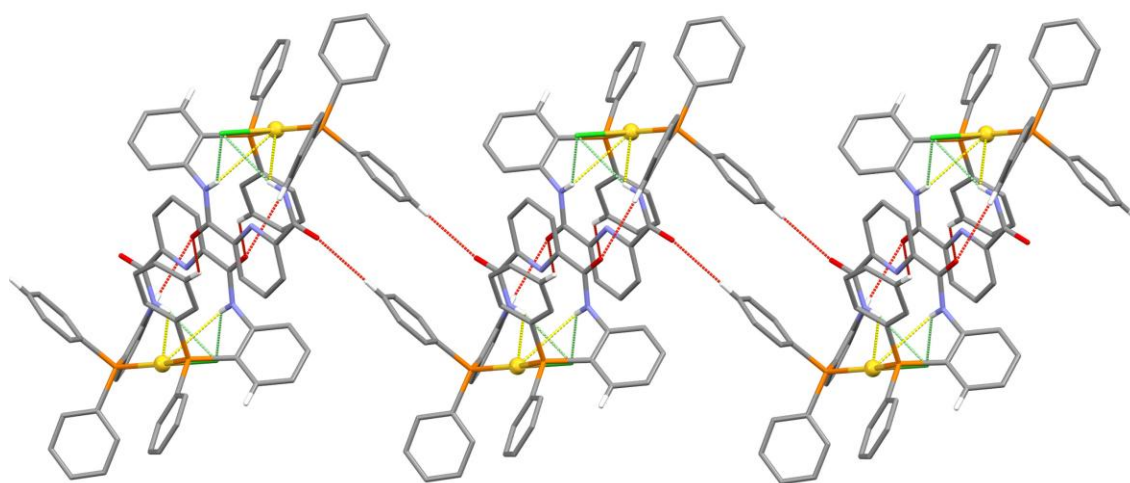

(B)

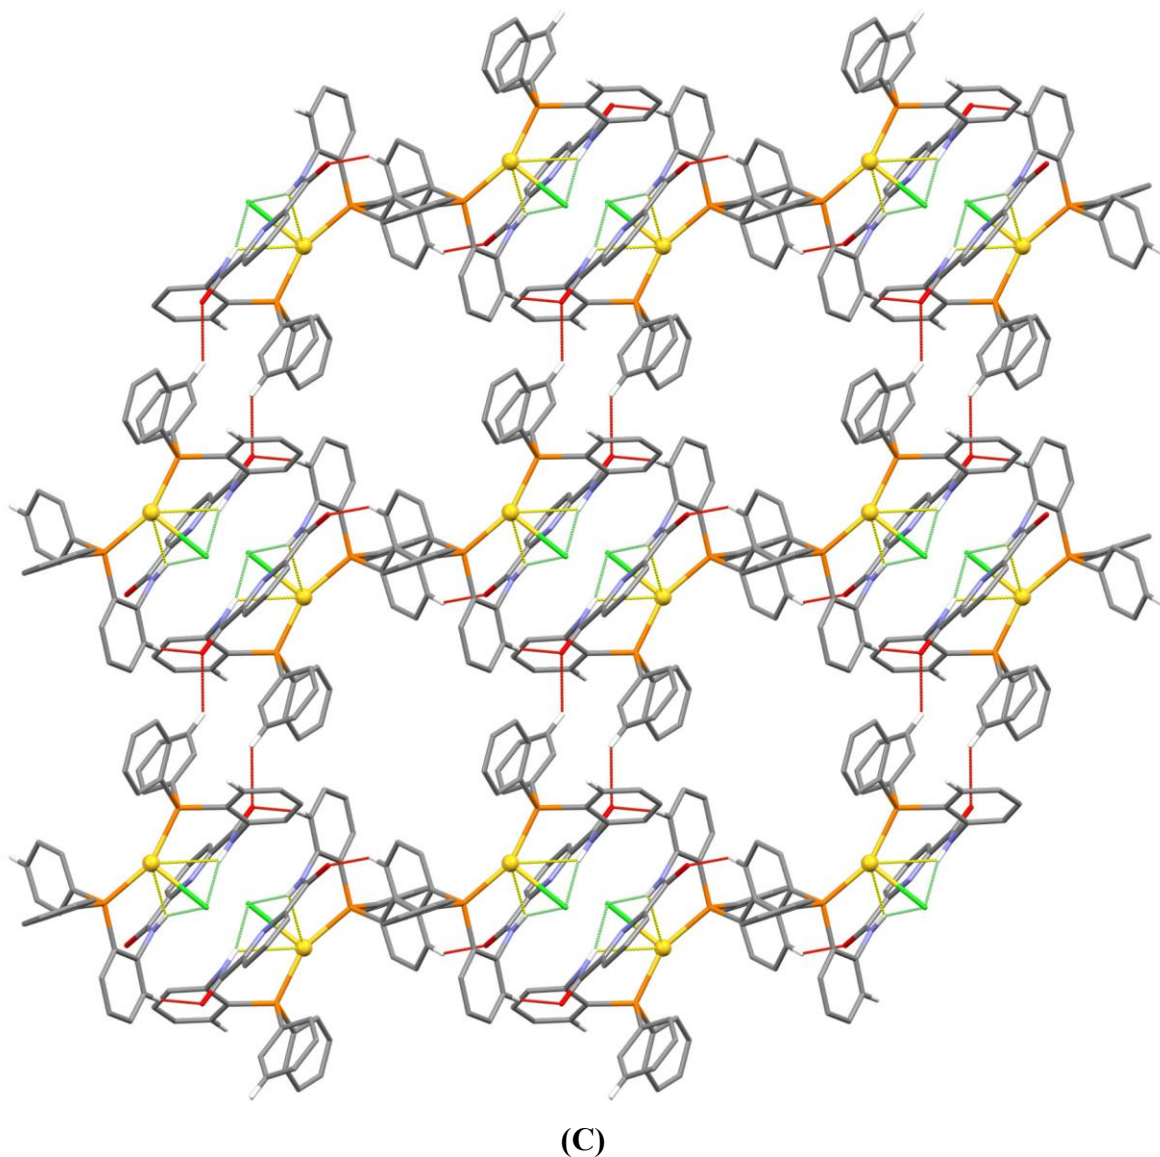

**Figure S14.** Part of the supramolecular of  $2 \cdot 1.5\text{CH}_2\text{Cl}_2$ : 1D network formed by bifurcated C-H...O hydrogen bonds viewed from the crystallographic *a*-axis (A), 2D network formed by C-H...O hydrogen bonds viewed from the crystallographic *b*-axis (B) or *c*-axis (C). Hydrogen atoms (except those involved in hydrogen bonds) have been omitted for clarity. Color code: gold (yellow), phosphorus (orange), chlorine (green), nitrogen (purple), oxygen (red), carbon (gray), hydrogen (white), N-H...Au (dashed yellow), C-H...Cl (dashed green), and C-H...O (dashed red) hydrogen bonds.

**Table S3.** Selected optimized bond lengths (Å) and angles (°) for model systems of compounds **2**, and **3**.

|           | Au-P      | P-Au-P | Au-Cl | N-H...Cl | N-H...N | N-H...Au  | N...Au                        | C-H...Au  |
|-----------|-----------|--------|-------|----------|---------|-----------|-------------------------------|-----------|
| <b>2a</b> | 2.31-2.32 | 146.1  | 2.56  | 2.30     | 2.30    | 2.77-2.85 | 3.76 (arom)                   | 2.89-3.01 |
| <b>3a</b> | 2.31-2.32 | 175.9  | -     | -        | 1.96    | 2.66      | 3.51 (arom)<br>2.99 (amidate) | 2.87-3.17 |

**Table S4.** IBSIW indexes for model systems **2a** and **3a**.

|           | N-H...Cl   | N-H...Au   | N(amidate)...Au | C-H...Au               |
|-----------|------------|------------|-----------------|------------------------|
| <b>2a</b> | 1.98, 1.98 | 0.90, 0.75 | -               | 0.25, 0.35, 0.54, 0.66 |
| <b>3a</b> | -          | 1.08       | 1.27            | 0.66, 0.36, 0.34, 0.33 |
